# Supplementary material
Source: Research Square preprint supplement (doi:10.21203/rs.3.rs-9003769/v1)
Supplement: Supplementary file 1 [file 16d42757d54ab2da9d4a5199.docx]

**English Version of the Survey Questionnaire**

**Section 1: Sociodemographic Information**

**Gender:**

- Male
- Female

**Age:** __________

**Region:**

- Central region
- Eastern region
- Western region
- Northern region
- Southern region

**Education level:**

- Less than high school
- High school
- Bachelor’s degree
- Higher education

**Monthly income:**

- Less than 5000 Saudi Riyals
- 5000–14,999 Saudi Riyals
- More than 15,000 Saudi Riyals

**Section 2: Social Media Usage Patterns**

**1. Do you use any form of social media?**
(Twitter, Facebook, Snapchat, WhatsApp, Instagram, YouTube, Telegram)

- Yes
- No

**2. Which of the following social media platforms do you usually use?**
(You may choose more than one)

- Twitter
- Facebook
- Snapchat
- WhatsApp
- Instagram
- YouTube
- Telegram

**3. When did you start using social media platforms?**

- Less than 1 year
- Less than 2 years
- Less than 3 years
- More than 3 years

**4. On average, how much time do you spend on social media daily?**

- Up to 1 hour
- Up to 2 hours
- Up to 3 hours
- Up to 4 hours
- More than 4 hours

**5. What is your main purpose for using social media?**

- Personal
- Professional
- Both (mainly personal)
- Both (mainly professional)

**6. Where do you usually access social media?**

- At home
- At work
- Both (mainly at home)
- Both (mainly at work)

**Section 3: Using Social Media to Obtain Weight-Loss Information**

**1. Do you use social media to search for health-related information?**

- Always
- Frequently
- Sometimes
- Rarely
- Never

**2. Do you use social media to find ways to lose weight?**

- Always
- Frequently
- Sometimes
- Rarely
- Never

**3. When searching for weight-loss information, which social media platforms do you prefer to use?**
(You may choose more than one)

- Twitter
- Facebook
- Snapchat
- WhatsApp
- Instagram
- YouTube
- Telegram

**4. When searching for weight-loss information on social media, I obtain information from unqualified influencers (non-experts).**

- Always
- Frequently
- Sometimes
- Rarely
- Never

**5. When searching for weight-loss information on social media, I obtain information from qualified influencers (e.g., nutritionists, physicians, official organizations).**

- Always
- Frequently
- Sometimes
- Rarely
- Never

**6. When searching for weight-loss information on social media, what do you usually look for?**
(You may choose more than one)

- Diet plans
- Exercise
- Herbal remedies
- Medications

**7. Have you ever applied weight-loss information obtained from social media?**

- Always
- Frequently
- Sometimes
- Rarely
- Never

**8. Did you achieve positive and sustained weight-loss results after applying information obtained from social media?**

- Yes
- No
- I did not apply the information

**9. Do you trust the weight-loss information available on social media?**

- Always
- Frequently
- Sometimes
- Rarely
- Never

**10. In your opinion, how reliable is weight-loss information available on social media?**

- Unreliable
- Somewhat reliable
- Highly reliable
- Accurate

**11. Do you verify the reliability of weight-loss information obtained from social media?**

- Always
- Frequently
- Sometimes
- Rarely
- Never

**12. How do you usually verify the reliability of weight-loss information on social media?**

- By asking a family member
- By asking a friend
- By consulting reliable online sources (e.g., Ministry of Health website)
- By consulting a health professional (e.g., dietitian)
- I do not verify the information

**Section 4: Perceived Benefits of Using Social Media**

**1. Using weight-loss information from social media helps with weight loss.**

- Always
- Frequently
- Sometimes
- Rarely
- Never

**2. Using weight-loss information from social media helps improve overall health.**

- Always
- Frequently
- Sometimes
- Rarely
- Never

**3. Social media is an excellent source of weight-loss information.**

- Always
- Frequently
- Sometimes
- Rarely
- Never

**4. Social media is an excellent source for increasing awareness about weight loss.**

- Always
- Frequently
- Sometimes
- Rarely
- Never

**5. Social media is an easily accessible way to obtain weight-loss information.**

- Always
- Frequently
- Sometimes
- Rarely
- Never

**Section 5: Perceived Risks of Using Social Media**

**1. Using weight-loss information from social media may affect my health.**

- Always
- Frequently
- Sometimes
- Rarely
- Never

**2. Using weight-loss information from social media may negatively affect my weight.**

- Always
- Frequently
- Sometimes
- Rarely
- Never

**3. Weight-loss information on social media may be misleading.**

- Always
- Frequently
- Sometimes
- Rarely
- Never

**4. Weight-loss information on social media may be scientifically inaccurate.**

- Always
- Frequently
- Sometimes
- Rarely
- Never

**5. Weight-loss information on social media may be used purely for marketing or financial purposes.**

- Always
- Frequently
- Sometimes
- Rarely
- Never
